# Supplementary material for: Quantitation of nine alkyl amines in atmospheric samples: Separating structural isomers by ion chromatography
Source: Copernicus journal article supplement (doi:10.5194/amt-2016-343), 2016-11-15
Supplement: Supplementary file 1 [file amt-2016-343-supplement.pdf]

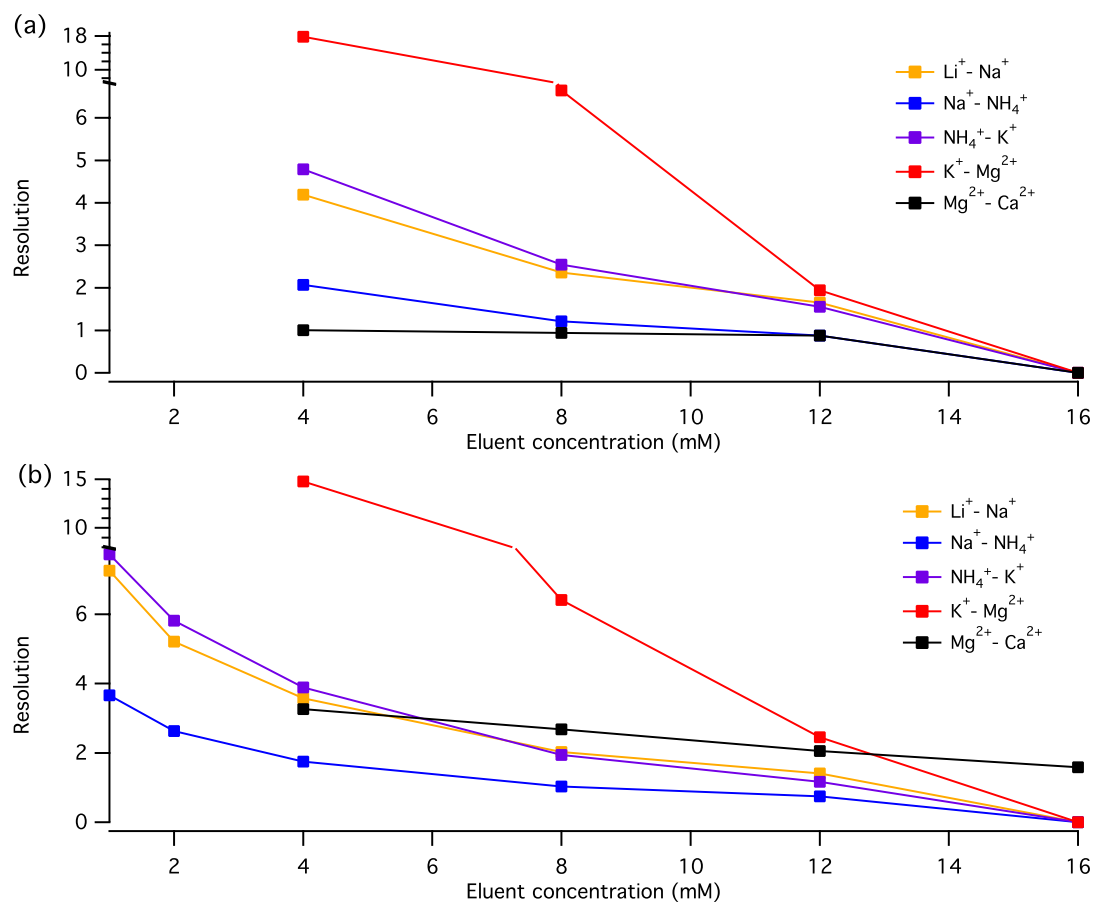

Figure S1. (A) Resolution of the six inorganic cation peak pairs using isocratic eluent methods at a flow rate of 0.75 ml min<sup>-1</sup>. (B) Resolution of the six inorganic cation peak pairs using isocratic eluent methods at a flow rate of 1.25 ml min<sup>-1</sup>.

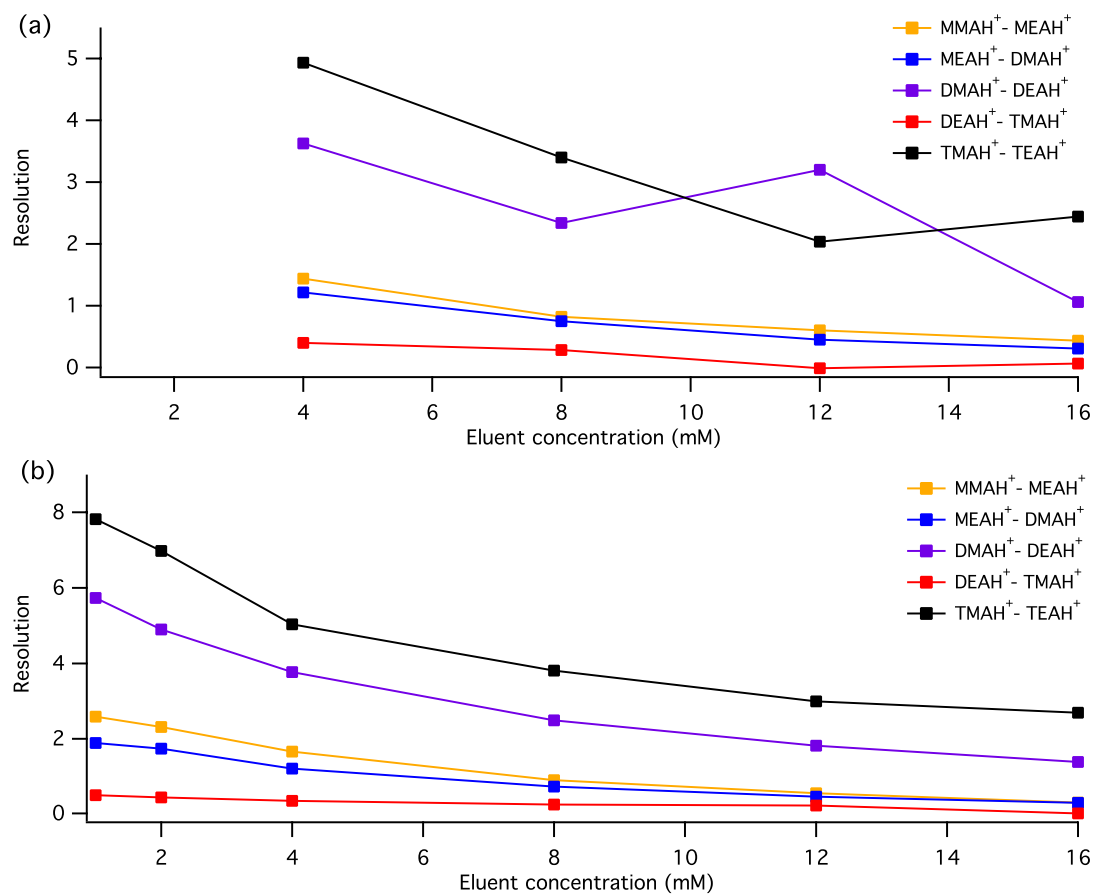

Figure S2. (A) Resolution of the six alkyl amine cation peak pairs using isocratic eluent methods at a flow rate of 0.75 ml min<sup>-1</sup>. (B) Resolution of the six alkyl amine cation peak pairs using isocratic eluent methods at a flow rate of 1.25 ml min<sup>-1</sup>.

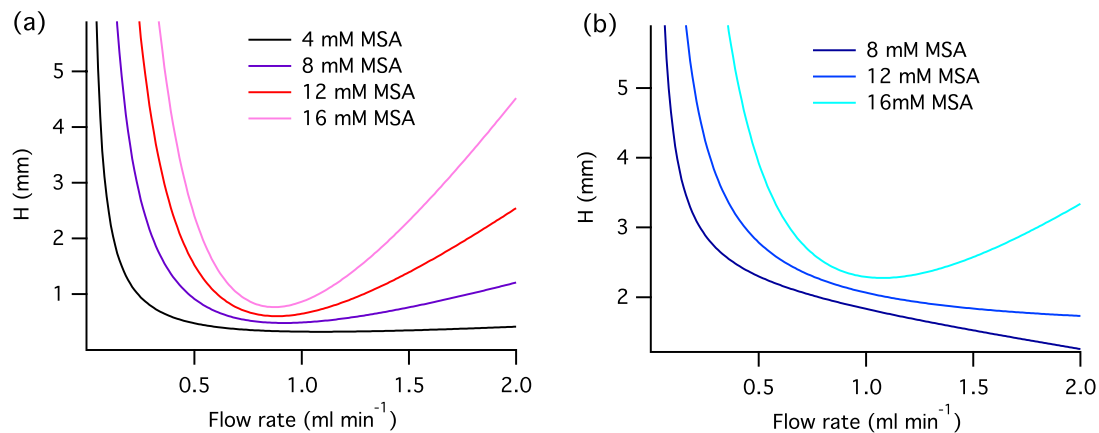

Figure S3. Calculated Van Deemter plots for the isocratic elutions of (a) MMAH<sup>+</sup> and (b) TEAH<sup>+</sup> at various MSA eluent concentrations and flow rates.

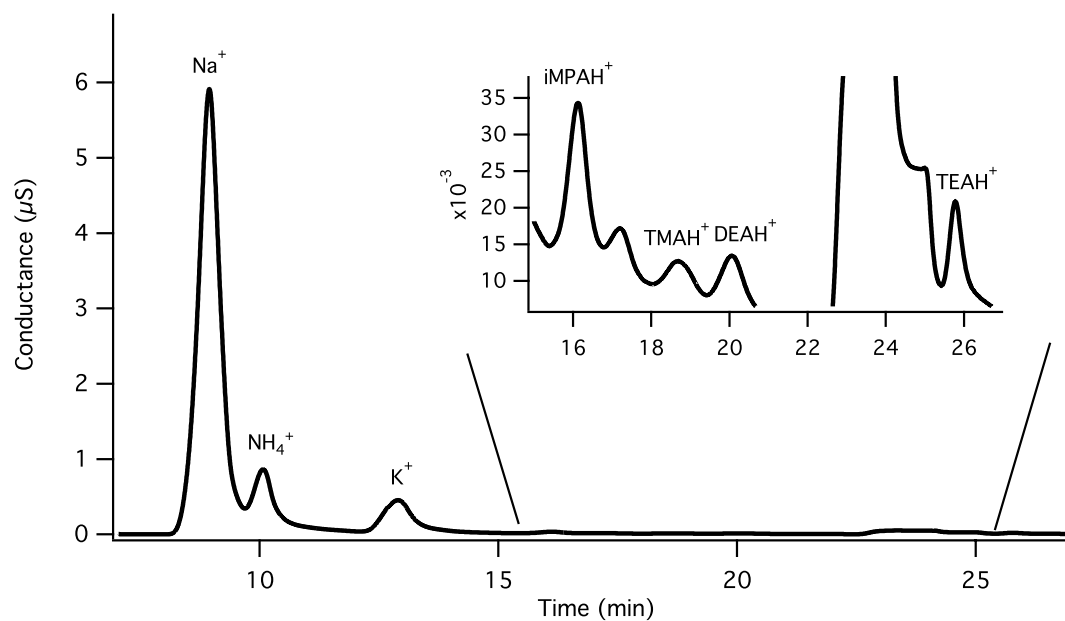

Figure S4. A chromatogram from an extracted PM<sub>2.5</sub> sample collected during a biomass-burning event in British Columbia at the Burnaby Kensington Park site.

Table S1. Mass loadings of amines and ammonium in size-resolved particle samples from an aged biomass burning plume sampled in St. John's, Newfoundland on July 6, 2013.

| $D_p$<br>( $\mu\text{m}$ ) | $\text{NH}_4^+$<br>mass<br>loading<br>( $\text{ng m}^{-3}$ ) | MMA<br>mass<br>loading<br>( $\text{ng m}^{-3}$ ) | DMA<br>mass<br>loading<br>( $\text{ng m}^{-3}$ ) | TMA<br>mass<br>loading<br>( $\text{ng m}^{-3}$ ) | MEA<br>mass<br>loading<br>( $\text{ng m}^{-3}$ ) | DEA mass<br>loading<br>( $\text{ng m}^{-3}$ ) | TEA mass<br>loading<br>( $\text{ng m}^{-3}$ ) |
|----------------------------|--------------------------------------------------------------|--------------------------------------------------|--------------------------------------------------|--------------------------------------------------|--------------------------------------------------|-----------------------------------------------|-----------------------------------------------|
| 10 - 18                    | BDL                                                          | 2.0 ± 0.2                                        | 0.6 ± 0.2                                        | BDL                                              | BDL                                              | 3 ± 1                                         | 2 ± 1                                         |
| 5.6 - 10                   | BDL                                                          | BDL                                              | 0.7 ± 0.3                                        | 2 ± 2                                            | BDL                                              | 2.2 ± 0.9                                     | 2 ± 1                                         |
| 3.2 - 5.6                  | BDL                                                          | 0.11 ± 0.03                                      | 0.4 ± 0.1                                        | BDL                                              | BDL                                              | BDL                                           | BDL                                           |
| 1.8 - 3.2                  | BDL                                                          | 0.10 ± 0.03                                      | 0.25 ± 0.09                                      | 2 ± 1                                            | BDL                                              | 1.4 ± 0.6                                     | 1.3 ± 0.7                                     |
| 1 - 1.8                    | BDL                                                          | 2.9 ± 0.8                                        | 3 ± 1                                            | 3 ± 2                                            | BDL                                              | 27 ± 4                                        | 4 ± 2                                         |
| 0.56 - 1                   | 719 ± 7                                                      | 1.4 ± 0.4                                        | 190 ± 4                                          | 5 ± 3                                            | 0.4 ± 0.2                                        | 1300 ± 200                                    | 2 ± 1                                         |
| 0.32 - 0.56                | 443 ± 4                                                      | 11 ± 3                                           | 208 ± 4                                          | 4 ± 3                                            | 0.21 ± 0.08                                      | 1300 ± 200                                    | 4 ± 2                                         |
| 0.18 - 0.32                | 236 ± 2                                                      | 6 ± 2                                            | 80 ± 2                                           | BDL                                              | BDL                                              | 560 ± 90                                      | 2 ± 1                                         |
| 0.10 - 0.18                | 30 ± 50                                                      | 0.4 ± 0.1                                        | 30 ± 10                                          | BDL                                              | 0.6 ± 0.2                                        | 200 ± 30                                      | BDL                                           |
| 0.056 - 0.10               | 20 ± 30                                                      | 3 ± 1                                            | 6 ± 2                                            | 4 ± 3                                            | BDL                                              | 58 ± 9                                        | 3 ± 2                                         |
| 0.032 - 0.056              | 40 ± 70                                                      | 0.11 ± 0.03                                      | 7 ± 3                                            | BDL                                              | BDL                                              | 49 ± 8                                        | BDL                                           |
| 0.018 - 0.032              | BDL                                                          | 0.10 ± 0.03                                      | BDL                                              | BDL                                              | BDL                                              | 4 ± 2                                         | BDL                                           |
| 0.010 - 0.018              | BDL                                                          | 0.30 ± 0.08                                      | BDL                                              | BDL                                              | BDL                                              | BDL                                           | BDL                                           |

BDL = below detection limits

Table S2. Mass loadings of amines and ammonium in a fresh biomass burning plume at Burnaby Kensington Park and North Vancouver/Second Narrows sites in British Columbia in July 2015.

| Sampling Site | Hours before and after maximum $\text{PM}_{2.5}$ mass loading | $\text{NH}_4^+$ mass loading ( $\text{ng m}^{-3}$ ) | iMPA mass loading ( $\text{ng m}^{-3}$ ) | TMA mass loading ( $\text{ng m}^{-3}$ ) | DEA mass loading ( $\text{ng m}^{-3}$ ) | TEA mass loading ( $\text{ng m}^{-3}$ ) |
|---------------|---------------------------------------------------------------|-----------------------------------------------------|------------------------------------------|-----------------------------------------|-----------------------------------------|-----------------------------------------|
| BKP           | - 24                                                          | 70 ± 20                                             | 1.4 ± 0.9                                | 0.6 ± 0.5                               | 0.9 ± 0.5                               | 0.2 ± 0.1                               |
| BKP           | - 16                                                          | 90 ± 30                                             | 6 ± 4                                    | 3 ± 2                                   | 1.6 ± 0.8                               | 0.08 ± 0.06                             |
| BKP           | - 8                                                           | 130 ± 40                                            | BDL                                      | 5 ± 4                                   | BDL                                     | BDL                                     |
| BKP           | 0                                                             | 90 ± 30                                             | 20 ± 10                                  | 9 ± 7                                   | 8 ± 4                                   | BDL                                     |
| BKP           | 8                                                             | 90 ± 30                                             | 2 ± 1                                    | 2 ± 1                                   | 1.2 ± 0.7                               | BDL                                     |
| BKP           | 16                                                            | 80 ± 20                                             | BDL                                      | BDL                                     | BDL                                     | BDL                                     |
| BKP           | 24                                                            | 31 ± 9                                              | BDL                                      | BDL                                     | BDL                                     | BDL                                     |
| NVSN          | - 24                                                          | 130 ± 40                                            | 5 ± 3                                    | BDL                                     | BDL                                     | BDL                                     |
| NVSN          | - 16                                                          | 400 ± 100                                           | 14 ± 9                                   | BDL                                     | BDL                                     | BDL                                     |
| NVSN          | 0                                                             | 300 ± 100                                           | 40 ± 30                                  | BDL                                     | BDL                                     | BDL                                     |
| NVSN          | 8                                                             | 300 ± 100                                           | 60 ± 40                                  | BDL                                     | BDL                                     | BDL                                     |
| NVSN          | 16                                                            | 70 ± 20                                             | BDL                                      | BDL                                     | BDL                                     | BDL                                     |
| NVSN          | 24                                                            | 100 ± 30                                            | BDL                                      | BDL                                     | BDL                                     | BDL                                     |

BDL = below detection limits
