# Supplementary material for: Quantitation of nine alkyl amines in atmospheric samples: Separating structural isomers by ion chromatography
Source: Copernicus journal article supplement (doi:10.5194/amt-2016-343), 2016-11-15
Supplement: Supplementary file [file amt-2016-343-AC2-supplement.pdf]

```

{Initial Time}  Instrument Setup
Pump_ECD.Pressure.UpperLimit      3000 [psi]
Sampler.DelayVolume                125 [µl]
Pump_ECD.%A.Equate                "MSA"
Pump_ECD.Pressure.LowerLimit      200 [psi]
Pump_ECD.ColumnTemperature.Nominal 55.0 [°C]
Pump_ECD.CellTemperature.Nominal  30.0 [°C]
Pump_ECD.Data_Collection_Rate    5.0 [Hz]
Pump_ECD.Suppressor_Type         CERS_4mm
Pump_ECD.Suppressor_MSA          10.0 [mM]
Pump_ECD.Suppressor_RecommendedCurrent 37 [mA]
Pump_ECD.Suppressor_Current      37 [mA]
Pump_ECD.CR_TC                    On
Sampler.FlushFactor                1
Sampler.DeliverSpeed              1.0 [ml/min]
Sampler.InjectPosition
Sampler.DeliverRinse              500,Position=Rinse
Sampler.DeliverSample             Volume=Bleed
Sampler.LoadPosition
Sampler.DeliverSample
Sampler.EndSamplePrep
Pump_ECD.Flow                      1.25
Pump_ECD.EluentGenerator_2.Concentration 1.00 [mM]
-5.000 Equilibration              Duration = 5.000 [min]
Pump_ECD.EluentGenerator_2.Concentration 1.00 [mM]
0.000 Inject
Wait  Sampler.CycleTimeState,
      Run=Hold,
      Timeout=Infinite
Sampler.Inject
Start Run
Pump_ECD.Channel_Pressure.AcqOn
Pump_ECD.Autozero
Pump_ECD.ECD_1.AcqOn
Pump_ECD.ECD_Total.AcqOn
Run                                  Duration = 45.000 [min]
Pump_ECD.EluentGenerator_2.Concentration 1.00 [mM]
Pump_ECD.EluentGenerator_2.Curve      5
20.000
Pump_ECD.EluentGenerator_2.Concentration 1.00 [mM]
Pump_ECD.EluentGenerator_2.Curve      7
Pump_ECD.EluentGenerator_2.Concentration 4.00 [mM]
Pump_ECD.EluentGenerator_2.Curve      7
30.000
Pump_ECD.EluentGenerator_2.Concentration 10.00 [mM]
Pump_ECD.EluentGenerator_2.Curve      7
40.000
Pump_ECD.EluentGenerator_2.Concentration 10.00 [mM]
Pump_ECD.EluentGenerator_2.Curve      5
Pump_ECD.EluentGenerator_2.Concentration 1.00 [mM]
Pump_ECD.EluentGenerator_2.Curve      5
45.000 Stop Run
Pump_ECD.Channel_Pressure.AcqOff
Pump_ECD.ECD_1.AcqOff
Pump_ECD.ECD_Total.AcqOff
End

```

Fig S1. Chromeleon method data file for final gradient method at 55 °C

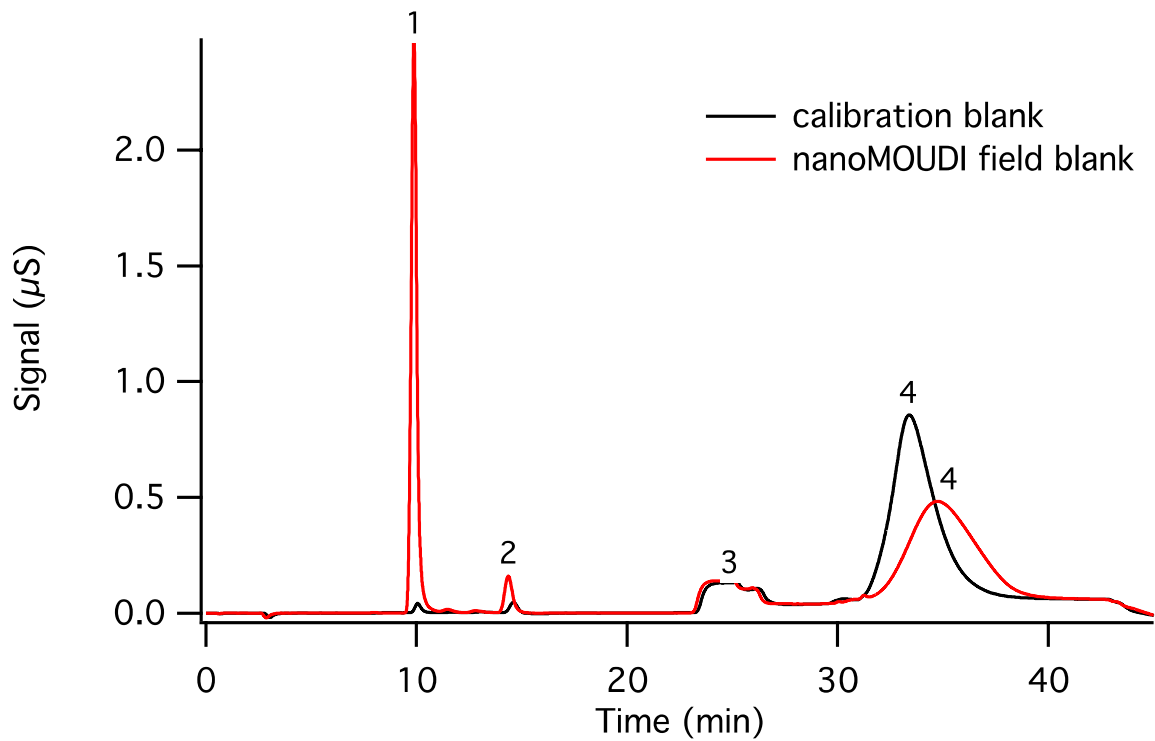

Fig S2. Sample chromatograms of a calibration blank and a size-resolved BB MOUDI foil substrate field blank. The peaks labelled above are as follows:  $\text{Na}^+$  (1),  $\text{K}^+$  (2), System peak (3), and  $\text{Ca}^{2+}$  (4).

5

10

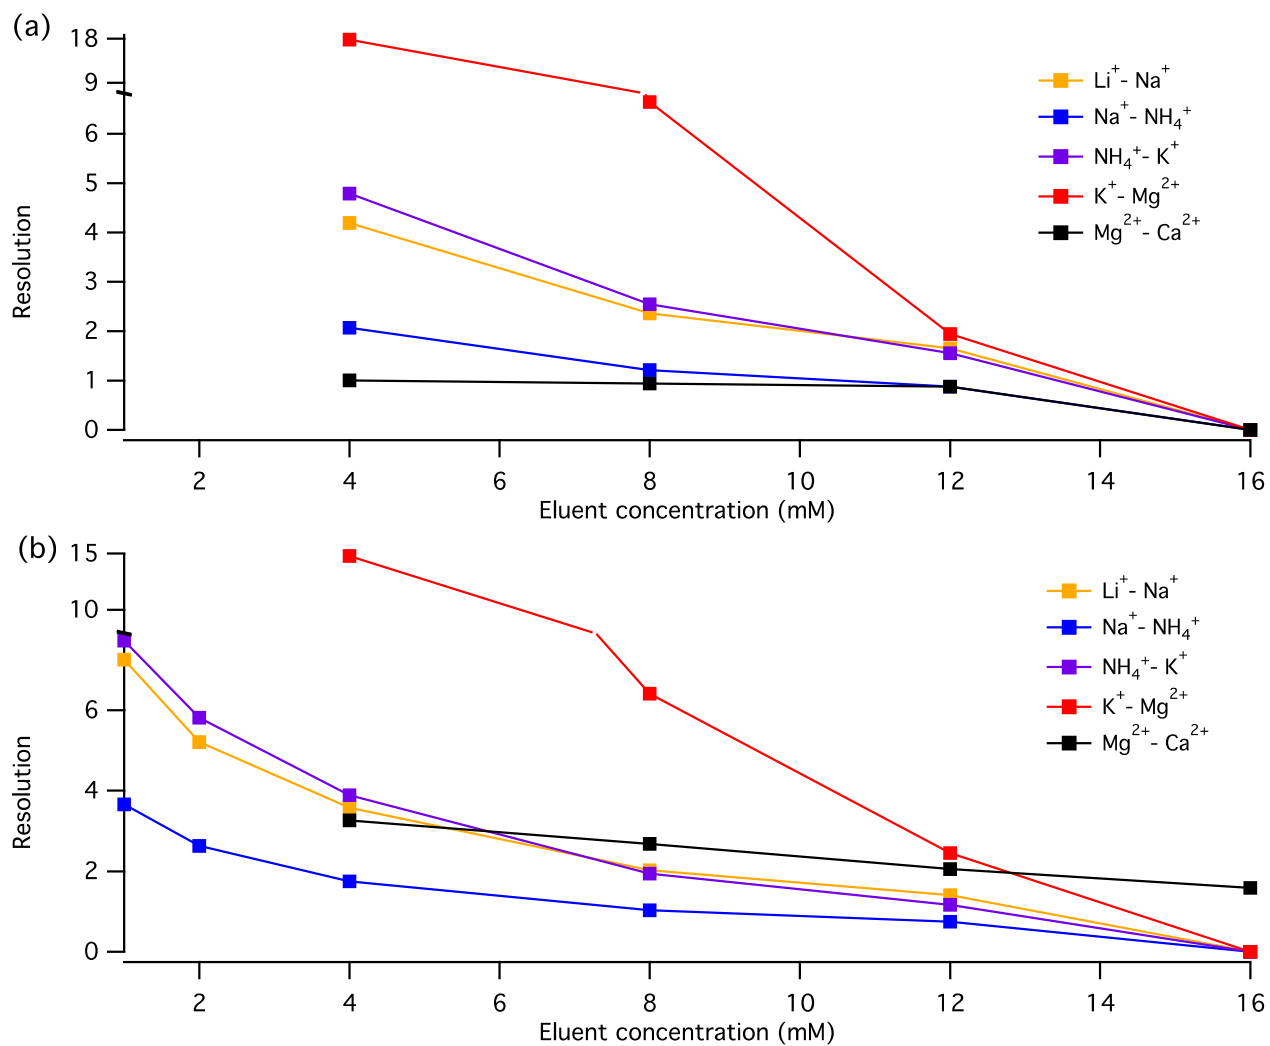

5 Fig S3. (a) Resolution of the six inorganic cation peak pairs using isocratic eluent methods at a flow rate of 0.75 ml min<sup>-1</sup>. (b) Resolution of the six inorganic cation peak pairs using isocratic eluent methods at a flow rate of 1.25 ml min<sup>-1</sup>. The resolution axis is split to indicate eluent concentrations where dramatic increases in separation occurred.

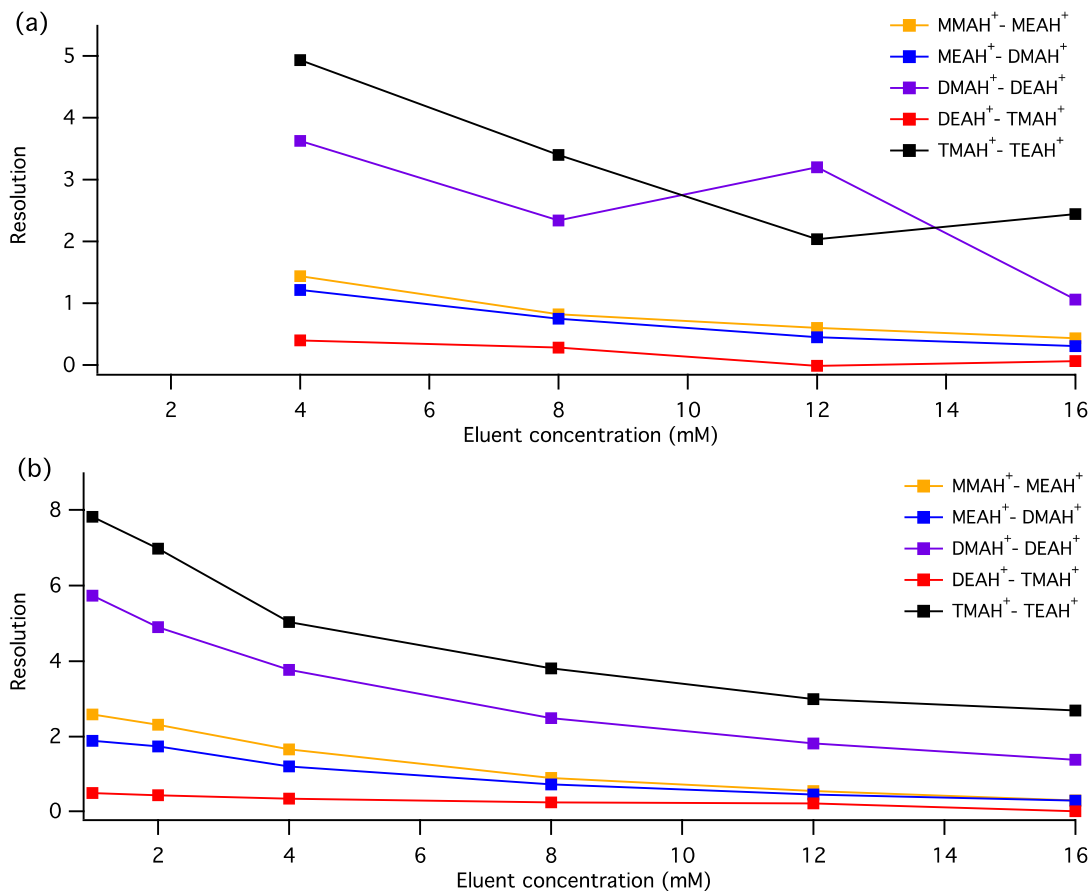

Fig S4. (a) Resolution of the six alkyl amine cation peak pairs using isocratic eluent methods at a flow rate of 0.75 ml min<sup>-1</sup>.

5 (b) Resolution of the six alkyl amine cation peak pairs using isocratic eluent methods at a flow rate of 1.25 ml min<sup>-1</sup>.

10

15

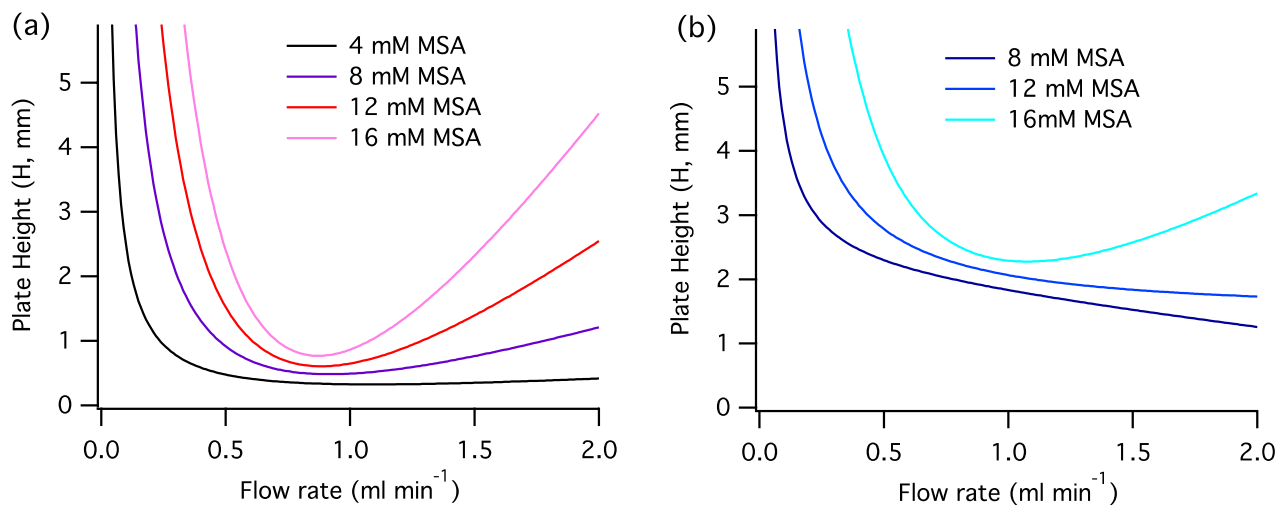

Fig S5. Calculated Van Deemter plots for the isocratic elutions of (a) MMAH<sup>+</sup> and (b) TEAH<sup>+</sup> at various MSA eluent concentrations and flow rates.

5

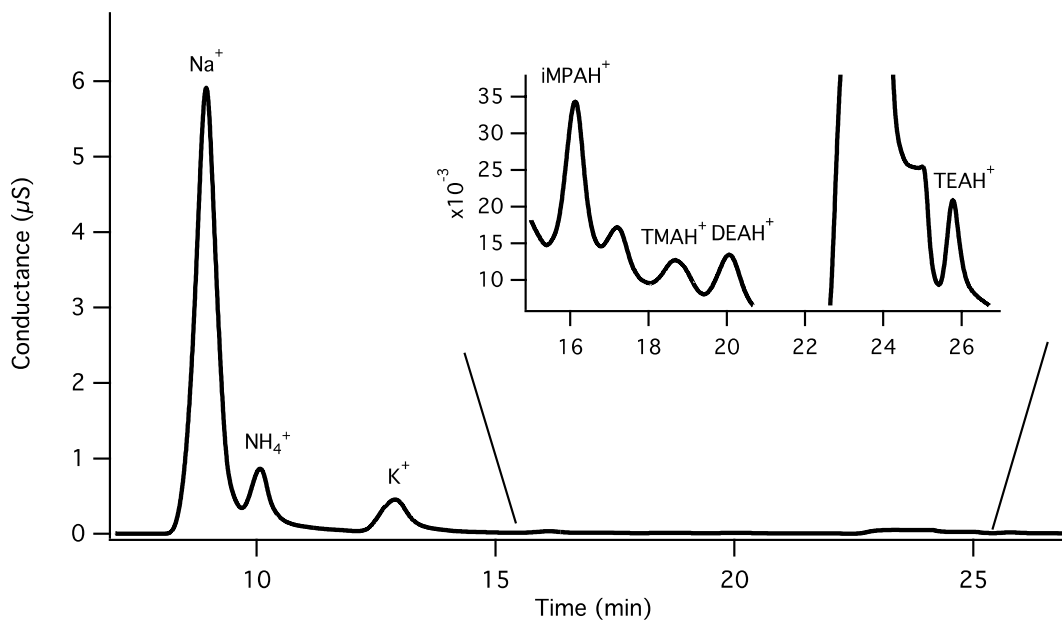

Fig S6. A chromatogram from an extracted PM<sub>2.5</sub> sample collected during a biomass-burning event in British Columbia at the Burnaby Kensington Park site.

Table S1. Comparison of methyl and ethyl amine external and standard addition calibration slopes and retention times ( $t_r$ )

| Analyte           | External<br>( $\mu\text{S} \cdot \text{min mol}^{-1}$ ) | Standard addition<br>( $\mu\text{S} \cdot \text{min mol}^{-1}$ ) | Difference<br>(%) | External $t_r$<br>range (min) | Standard addition $t_r$<br>range (min) |
|-------------------|---------------------------------------------------------|------------------------------------------------------------------|-------------------|-------------------------------|----------------------------------------|
| MMAH <sup>+</sup> | 0.41E08                                                 | 0.42E08                                                          | 2                 | 9.0 – 9.4                     | 9.3 – 9.6                              |
| DMAH <sup>+</sup> | 0.98E08                                                 | 1.01E08                                                          | 3                 | 10.4 – 10.8                   | 10.6 – 11.0                            |
| TMAH <sup>+</sup> | 0.13E08                                                 | 0.13E08                                                          | 0                 | 13.2 – 13.5                   | 13.4 – 13.8                            |
| MEAH <sup>+</sup> | 0.47E08                                                 | 0.51E08                                                          | 8                 | 10.1 – 10.5                   | 10.3 – 10.8                            |
| DEAH <sup>+</sup> | 1.06E08                                                 | 1.08E08                                                          | 2                 | 13.9 – 14.2                   | 14.1 – 14.5                            |
| TEAH <sup>+</sup> | 0.57E08                                                 | 0.57E08                                                          | 0                 | 23.6 – 24.0                   | 23.9 -24.2                             |

5

Table S2. Analytical performance of other IC methods used for the determination of atmospheric methyl and ethyl amines.

| Analyte           | Detection<br>method | Pre-<br>conc | Column      | LOD (pg) | Precision<br>(%) | Reference               |
|-------------------|---------------------|--------------|-------------|----------|------------------|-------------------------|
| MMAH <sup>+</sup> | CD                  | Yes          | CS10        | 31       | 2 – 2.7          | Chang et al., 2003      |
|                   | CD                  | Yes          | CS12A       | 18       | 4.5              | VandenBoer et al., 2012 |
|                   | CD                  | No           | CS14        | 2500     | 3.8              | Verrielle et al., 2012  |
|                   | MS                  | No           | CS14        | 500      | 5.8              | Verrielle et al., 2012  |
|                   | CD                  | Yes          | CS17        | 540      | 4.8              | VandenBoer et al., 2012 |
|                   | CD                  | Yes          | CS19        | 30 - 650 | 5                | This work               |
|                   | CD                  | No           | Metrosep C2 | 21500    | 0.4              | Erupe et al., 2010      |
|                   | CD                  | Yes          | Metrosep C4 | 2100     | 12.2             | Huang et al., 2014      |
| DMAH <sup>+</sup> | CD                  | No           | Metrosep C4 | 160      | 7.3              | Dawson et al., 2014     |
|                   | CD                  | Yes          | CS10        | 40       | 2 – 2.7          | Chang et al., 2003      |
|                   | CD                  | Yes          | CS12A       | 25       | 1                | VandenBoer et al., 2012 |
|                   | CD                  | No           | CS14        | 4000     | 10.5             | Verrielle et al., 2012  |
|                   | MS                  | No           | CS14        | 150      | 11.4             | Verrielle et al., 2012  |
|                   | CD                  | Yes          | CS17        | 870      | 14               | VandenBoer et al., 2012 |
|                   | CD                  | No           | CS17        | 1500     | 1.2              | Li et al., 2009         |
|                   | CD                  | Yes          | CS19        | 40 - 650 | 5                | This work               |
| TMAH <sup>+</sup> | CD                  | No           | Metrosep C2 | 23000    | 1.4              | Erupe et al., 2010      |
|                   | CD                  | Yes          | Metrosep C4 | 3800     | 15.7             | Huang et al., 2014      |
|                   | CD                  | No           | Metrosep C4 | 320      | 1.1              | Dawson et al., 2014     |
|                   | CD                  | Yes          | CS10        | 26       | 2 – 2.7          | Chang et al., 2003      |
|                   | CD                  | Yes          | CS12A       | 220      | 1                | VandenBoer et al., 2012 |
|                   | CD                  | No           | CS14        | 2500     | N/A              | Verrielle et al., 2012  |
|                   | MS                  | No           | CS14        | 500      | 12.2             | Verrielle et al., 2012  |
|                   | CD                  | Yes          | CS17        | 1580     | 3.3              | VandenBoer et al., 2012 |
| CD                | No                  | CS17         | 2000        | 3.5      | Li et al., 2009  |                         |
| CD                | Yes                 | CS19         | 300 - 1200  | 16       | This work        |                         |

|                   |    |     |             |            |         |                         |
|-------------------|----|-----|-------------|------------|---------|-------------------------|
| MEAH <sup>+</sup> | CD | No  | Metrosep C2 | 38000      | 1.1     | Erupe et al., 2010      |
|                   | CD | No  | Metrosep C4 | 970        | 6.1     | Dawson et al., 2014     |
|                   | CD | Yes | CS10        | 37         | 2 – 2.7 | Chang et al., 2003      |
|                   | CD | Yes | CS12A       | 33         | 12      | VandenBoer et al., 2012 |
|                   | CD | No  | CS14        | 1000       | 5.1     | Verrielle et al., 2012  |
|                   | MS | No  | CS14        | 500        | 7.9     | Verrielle et al., 2012  |
|                   | CD | Yes | CS17        | 790        | 10      | VandenBoer et al., 2012 |
| DEAH <sup>+</sup> | CD | Yes | CS19        | 200 - 700  | 7       | This work               |
|                   | CD | Yes | Metrosep C4 | 2200       | 4.3     | Huang et al., 2014      |
|                   | CD | Yes | CS12A       | 195        | 14      | VandenBoer et al., 2012 |
|                   | CD | No  | CS14        | N/A        | N/A     | Verrielle et al., 2012  |
|                   | MS | No  | CS14        | 35         | 9       | Verrielle et al., 2012  |
|                   | CD | Yes | CS17        | 1140       | 3.5     | VandenBoer et al., 2012 |
|                   | CD | Yes | CS19        | 100 - 800  | 8       | This work               |
| TEAH <sup>+</sup> | CD | Yes | Metrosep C4 | 4100       | 4.6     | Huang et al., 2014      |
|                   | CD | Yes | CS12A       | 32000      | 2       | VandenBoer et al., 2012 |
|                   | CD | Yes | CS17        | 1870       | 5.9     | VandenBoer et al., 2012 |
|                   | CD | Yes | CS19        | 500 - 1400 | 12      | This work               |
|                   | CD | Yes | Metrosep C4 | 15900      | 5.1     | Huang et al., 2014      |

Table S3. Mass loadings of amines and ammonium in size-resolved particle diameter ( $D_p$ ) samples from an aged biomass burning plume sampled in St. John's, Newfoundland on July 6, 2013.

5

| $D_p$<br>( $\mu\text{m}$ ) | Mass loading ( $\text{ng m}^{-3}$ ) |                 |                 |                 |                 |                 |                 |
|----------------------------|-------------------------------------|-----------------|-----------------|-----------------|-----------------|-----------------|-----------------|
|                            | $\text{NH}_4^+$                     | $\text{MMAH}^+$ | $\text{DMAH}^+$ | $\text{TMAH}^+$ | $\text{MEAH}^+$ | $\text{DEAH}^+$ | $\text{TEAH}^+$ |
| 10 - 18                    | BDL                                 | $2.0 \pm 0.2$   | $0.6 \pm 0.2$   | BDL             | BDL             | $3 \pm 1$       | $2 \pm 1$       |
| 5.6 - 10                   | BDL                                 | BDL             | $0.7 \pm 0.3$   | $2 \pm 2$       | BDL             | $2.2 \pm 0.9$   | $2 \pm 1$       |
| 3.2 – 5.6                  | BDL                                 | $0.11 \pm 0.03$ | $0.4 \pm 0.1$   | BDL             | BDL             | BDL             | BDL             |
| 1.8 – 3.2                  | BDL                                 | $0.10 \pm 0.03$ | $0.25 \pm 0.09$ | $2 \pm 1$       | BDL             | $1.4 \pm 0.6$   | $1.3 \pm 0.7$   |
| 1 – 1.8                    | BDL                                 | $2.9 \pm 0.8$   | $3 \pm 1$       | $3 \pm 2$       | BDL             | $27 \pm 4$      | $4 \pm 2$       |
| 0.56 – 1                   | $719 \pm 7$                         | $1.4 \pm 0.4$   | $190 \pm 4$     | $5 \pm 3$       | $0.4 \pm 0.2$   | $1300 \pm 200$  | $2 \pm 1$       |
| 0.32 – 0.56                | $443 \pm 4$                         | $11 \pm 3$      | $208 \pm 4$     | $4 \pm 3$       | $0.21 \pm 0.08$ | $1300 \pm 200$  | $4 \pm 2$       |
| 0.18 – 0.32                | $236 \pm 2$                         | $6 \pm 2$       | $80 \pm 2$      | BDL             | BDL             | $560 \pm 90$    | $2 \pm 1$       |
| 0.10 – 0.18                | $30 \pm 50$                         | $0.4 \pm 0.1$   | $30 \pm 10$     | BDL             | $0.6 \pm 0.2$   | $200 \pm 30$    | BDL             |

|               |         |             |       |       |     |        |       |
|---------------|---------|-------------|-------|-------|-----|--------|-------|
| 0.056 – 0.10  | 20 ± 30 | 3 ± 1       | 6 ± 2 | 4 ± 3 | BDL | 58 ± 9 | 3 ± 2 |
| 0.032 – 0.056 | 40 ± 70 | 0.11 ± 0.03 | 7 ± 3 | BDL   | BDL | 49 ± 8 | BDL   |
| 0.018 – 0.032 | BDL     | 0.10 ± 0.03 | BDL   | BDL   | BDL | 4 ± 2  | BDL   |
| 0.010 – 0.018 | BDL     | 0.30 ± 0.08 | BDL   | BDL   | BDL | BDL    | BDL   |

BDL = below detection limits

- 5 Table S4. Mass loadings of amines and ammonium in a fresh biomass burning plume at Burnaby Kensington Park and North Vancouver/Second Narrows sites in British Columbia in July 2015. Relative time is calculated with respect to the local maximum PM<sub>2.5</sub> intrusion.

| Sampling site | Relative Time (h) | Mass loading (ng m <sup>-3</sup> ) |                    |                   |                   |                   |
|---------------|-------------------|------------------------------------|--------------------|-------------------|-------------------|-------------------|
|               |                   | NH <sub>4</sub> <sup>+</sup>       | iMPAH <sup>+</sup> | TMAH <sup>+</sup> | DEAH <sup>+</sup> | TEAH <sup>+</sup> |
| BKP           | - 24              | 70 ± 20                            | 1.4 ± 0.9          | 0.6 ± 0.5         | 0.9 ± 0.5         | 0.2 ± 0.1         |
| BKP           | - 16              | 90 ± 30                            | 6 ± 4              | 3 ± 2             | 1.6 ± 0.8         | 0.08 ± 0.06       |
| BKP           | - 8               | 130 ± 40                           | BDL                | 5 ± 4             | BDL               | BDL               |
| BKP           | 0                 | 90 ± 30                            | 20 ± 10            | 9 ± 7             | 8 ± 4             | BDL               |
| BKP           | 8                 | 90 ± 30                            | 2 ± 1              | 2 ± 1             | 1.2 ± 0.7         | BDL               |
| BKP           | 16                | 80 ± 20                            | BDL                | BDL               | BDL               | BDL               |
| BKP           | 24                | 31 ± 9                             | BDL                | BDL               | BDL               | BDL               |
| NVSN          | - 24              | 130 ± 40                           | 5 ± 3              | BDL               | BDL               | BDL               |
| NVSN          | - 16              | 400 ± 100                          | 14 ± 9             | BDL               | BDL               | BDL               |
| NVSN          | 0                 | 300 ± 100                          | 40 ± 30            | BDL               | BDL               | BDL               |
| NVSN          | 8                 | 300 ± 100                          | 60 ± 40            | BDL               | BDL               | BDL               |
| NVSN          | 16                | 70 ± 20                            | BDL                | BDL               | BDL               | BDL               |
| NVSN          | 24                | 100 ± 30                           | BDL                | BDL               | BDL               | BDL               |

BDL = below detection limits
